# Supplementary material
Source: PubMed Central journal article supplement (PMC6803027)

FIG E1

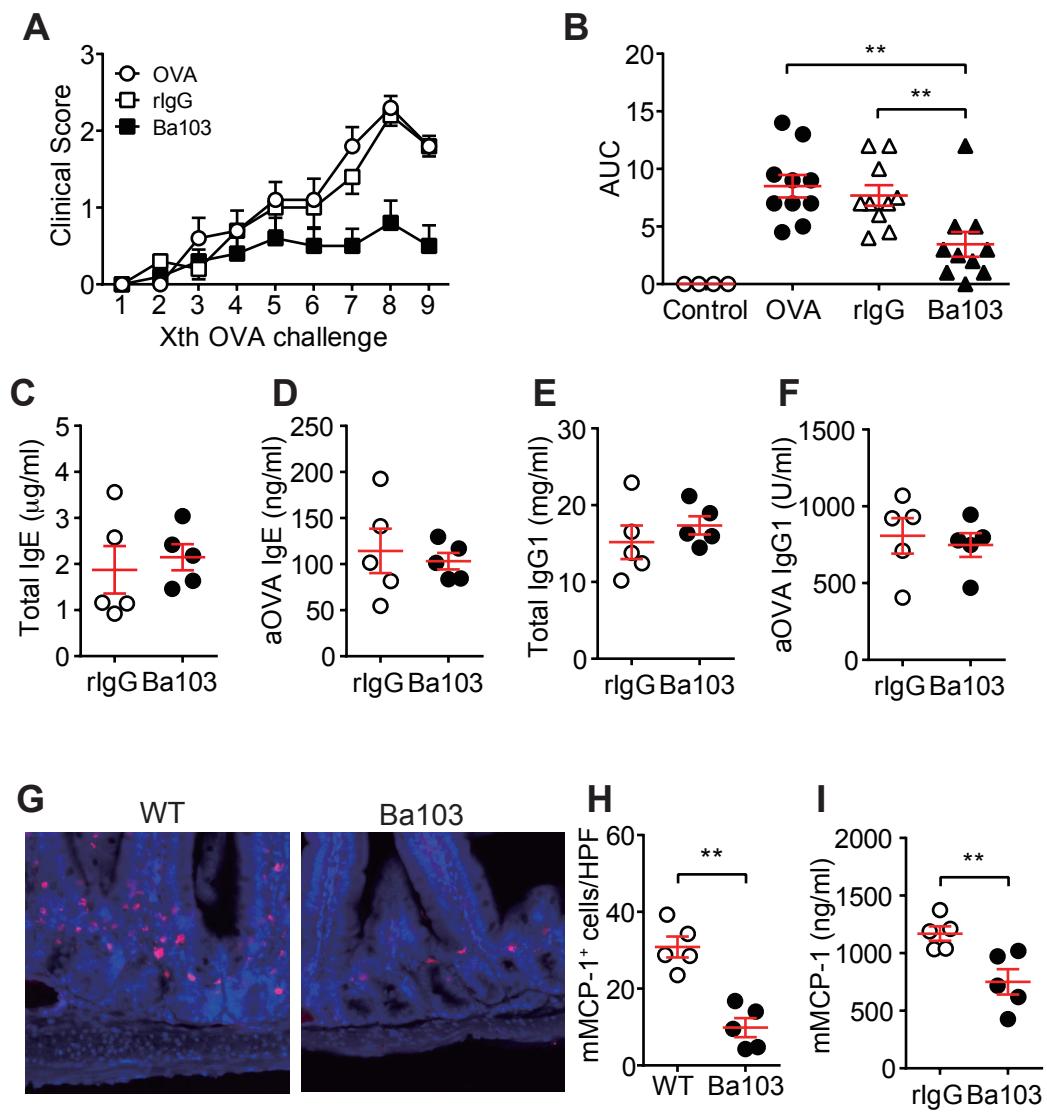

FIG E2

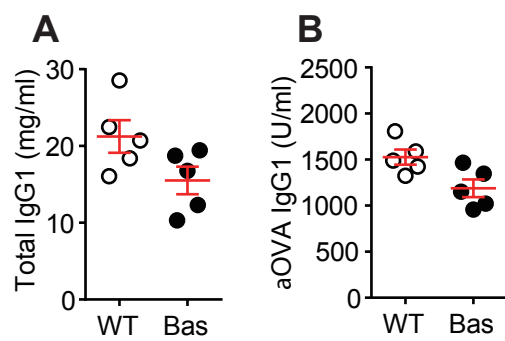

Supplement: NIHMS1024835-supplement-Supp_FigS1-2.pdf [file NIHMS1024835-supplement-Supp_FigS1-2.pdf]
